# Supplementary material
Source: HighWire-hosted journal article supplement (https://care.diabetesjournals.org/content/suppl/2006/03/01/29.3.531)
Supplement: dc1254OnlineAppendix.pdf [file dc1254OnlineAppendix.pdf]

**Appendix 1:** Availability of data among selected subgroups of 998 diabetic adults in NHANES 1999-2002.

|                                         | N   |
|-----------------------------------------|-----|
| Race                                    |     |
| White                                   | 373 |
| Black                                   | 253 |
| Mexican American                        | 280 |
| Duration of diabetes (years)            |     |
| 0-1                                     | 125 |
| 2-5                                     | 229 |
| 6-9                                     | 137 |
| 10-14                                   | 142 |
| $\geq 15$                               | 289 |
| Household income (thousands of dollars) |     |
| <20                                     | 350 |
| 20-34                                   | 218 |
| 35-54                                   | 137 |
| $\geq 55$                               | 140 |
| Education                               |     |
| < High school                           | 519 |
| High school equivalent                  | 202 |
| Some college                            | 273 |
| Insurance                               |     |
| Some                                    | 859 |
| None                                    | 116 |
